# Supplementary material for: Elevated polyglutamylation and tau phosphorylation levels are associated with cognitive impairment at diagnosis in patients with primary central nervous system lymphoma
Source: Research Square preprint supplement (doi:10.21203/rs.3.rs-6983936/v1), 2025-07-18
Supplement: Supplementary file 1 [file 1c610d45bcb6af67dcf35564.docx]

**Supplementary Table 1** Primer sequences for quantitative polymerase chain reaction

| **Target gene (human)** | **Forward** | **Reverse** |
| --- | --- | --- |
| *MAPT* | CCA GTC CAA GTG TGG CTC AAA G | GCC TAA TGA GCC ACA CTT GGA G |
| *PIN1* | ACA GTT CAG CGA CTG CAG CTC A | GCA GCG CAA ACG AGG CGT CTT |
| *PPP2R5A* | AGA AGA GGA TGA ACC CAC GC | TGC TAG GCT GGA AAT CAG GG |
| *CDK5* | CCA CAA CAT CCC TGG TGA ACG T | CCT CTT CTG CTG AGA TAC GCT G |
| *GSK3β* | ATT TCC AGG GGA TAG TGG TGT | TCC TGA CGA ATC CTT AGT CCA AG |
| *TBP* | TGT ATC CAC AGT GAA TCT TGG TTG | GGT TCG TGG CTC TCT TAT CCT C |

**Supplementary Table 2** Comparison of tumor involvement between patients with and without cognitive impairment at diagnosis

|  | **Cognitive impairment** | |  |
| --- | --- | --- | --- |
|  | **Yes** | **No** |  |
| **Variables** | n = 84 | n = 56 | ***p*** |
| Number of involved brain regions (# of pts) |  |  |  |
| Single/multiple | 26/58 | 26/30 | 0.075 |
| Tumor involvement in each brain region (# of pts) |  |  |  |
| Rt frontal lobe | 26 (31.0%) | 11 (19.6%) | 0.17 |
| Lt frontal lobe | 27 (32.1%) | 11 (19.6%) | 0.12 |
| Rt temporal lobe (including the hippocampus) | 10 (11.9%) | 6 (10.7%) | 1 |
| Lt temporal lobe (including the hippocampus) | 8 (9.52%) | 2 (3.57%) | 0.32 |
| Rt temporoparietal lobe (excluding the hippocampus) | 11 (13.1%) | 8 (14.3%) | 1 |
| Lt temporoparietal lobe (excluding the hippocampus) | 15 (17.9%) | 5 (8.93%) | 0.22 |
| Rt occipital lobe | 6 (7.14%) | 4 (7.14%) | 1 |
| Lt occipital lobe | 4 (4.76%) | 2 (3.57%) | 1 |
| Rt basal ganglia and/or thalamus | 24 (28.6%) | 14 (25.0%) | 0.70 |
| Lt basal ganglia and/or thalamus | 21 (25.0%) | 10 (17.9%) | 0.41 |
| Corpus callosum and/or cingulate gyrus | 35 (41.7%) | 6 (10.7%) | <0.0001 |
| Ventricle | 16 (19.0%) | 4 (7.14%) | 0.053 |
| Brainstem and/or cerebellum | 9 (10.7%) | 26 (46.4%) | <0.0001 |

Lt, left; pts, patients; Rt, right

**Supplementary Table 3** Comparison of tumor involvement between patients with high- and low-polyglutamylation status

|  | **Polyglutamylation level** | |  |
| --- | --- | --- | --- |
|  | **High** | **Low** |  |
| **Variables** | n = 83 | n = 57 | ***p*** |
| Number of involved brain regions (# of pts) |  |  |  |
| Single/multiple | 27/56 | 25/32 | 0.21 |
| Tumor involvement in each brain region (# of pts) |  |  |  |
| Rt frontal lobe | 27 (32.5%) | 10 (17.5%) | 0.053 |
| Lt frontal lobe | 30 (36.1%) | 8 (14.0%) | 0.0039 |
| Rt temporal lobe (including the hippocampus) | 9 (10.8%) | 7 (12.3%) | 0.79 |
| Lt temporal lobe (including the hippocampus) | 4 (4.82%) | 6 (10.5%) | 0.32 |
| Rt temporoparietal lobe (excluding the hippocampus) | 13 (15.7%) | 6 (10.5%) | 0.46 |
| Lt temporoparietal lobe (excluding the hippocampus) | 14 (16.9%) | 6 (10.5%) | 0.34 |
| Rt occipital lobe | 6 (7.23%) | 4 (7.02%) | 1 |
| Lt occipital lobe | 3 (3.61%) | 3 (5.26%) | 0.69 |
| Rt basal ganglia and/or thalamus | 24 (28.9%) | 14 (24.6%) | 0.70 |
| Lt basal ganglia and/or thalamus | 23 (27.7%) | 8 (14.0%) | 0.064 |
| Corpus callosum and/or cingulate gyrus | 27 (32.5%) | 14 (24.6%) | 0.35 |
| Ventricle | 10 (12.0%) | 10 (17.5%) | 0.46 |
| Brainstem and/or cerebellum | 18 (21.7%) | 17 (29.8%) | 0.32 |

Lt, left; pts, patients; Rt, right

**Supplementary Table 4** Association between polyglutamylation levels and cognitive impairment at diagnosis in cases with left frontal lobe involvement

| **Polyglutamylation** | **Cognitive impairment** | | ***p*** |
| --- | --- | --- | --- |
| **Yes** | **No** |
| **High** | 23 | 7 | 0.20 |
| **Low** | 4 | 4 |
